# Supplementary material for: Illumina error profiles: resolving fine-scale variation in metagenomic sequencing data
Source: PubMed Central journal article supplement (PMC4787001; doi:10.1186/s12859-016-0976-y), 2016-03-11
Supplement: 12859_2016_976_MOESM1_ESM.pdf [file 12859_2016_976_MOESM1_ESM.pdf]

## Supplementary material

**Table S1** Overview of the experimental design for the metagenomic data sets (1). Library preparation methods: Nextera (N), NexteraXT (XT), Parkinson Low Input (P), Standard TruSeq (S); Templates: *Burkholderia xenovorans* (LB400) (BX), *Desulfovibrio desulfuricans* subsp. *desulfuricans* str. ATCC 27774 (DSV), *Enterococcus faecalis* V583 (EF), *Nanoarchaeum equitans* Kin4-M (NE), *Rhodospirillum rubrum* ATCC 11170 (RHO), *Thermus thermophilus* HB8 (TT), *Treponema vincentii* I (TV), balanced mock community (MB), unbalanced mock community (MUB);

| Platform | Meta ID | Library | Run    | Machine | Input ng | Template | Read length |         |
|----------|---------|---------|--------|---------|----------|----------|-------------|---------|
| MiSeq    | 36      | XT      | 1      | Miseq1  | 1        | MB       | 2x250bp     |         |
|          | 37      | XT      | 1      | Miseq1  | 1        | MB       | 2x250bp     |         |
|          | 38      | XT      | 1      | Miseq1  | 1        | MUB      | 2x250bp     |         |
|          | 39      | XT      | 1      | Miseq1  | 1        | MUB      | 2x250bp     |         |
|          | 43      | N       | 1      | Miseq1  | 50       | MB       | 2x250bp     |         |
|          | 44      | N       | 1      | Miseq1  | 50       | MUB      | 2x250bp     |         |
|          | 47      | XT      | 2      | Miseq2  | 1        | MB       | 2x250bp     |         |
|          | 48      | XT      | 2      | Miseq2  | 1        | MB       | 2x250bp     |         |
|          | 49      | XT      | 2      | Miseq2  | 1        | MUB      | 2x250bp     |         |
|          | 50      | XT      | 2      | Miseq2  | 1        | MUB      | 2x250bp     |         |
|          | 54      | N       | 2      | Miseq2  | 50       | MB       | 2x250bp     |         |
|          | 55      | N       | 2      | Miseq2  | 50       | MUB      | 2x250bp     |         |
|          | 59      | S       | 3      | Miseq2  | 250      | MB       | 2x250bp     |         |
|          | 60      | S       | 3      | Miseq2  | 250      | MUB      | 2x250bp     |         |
|          | 76      | XT      | 4      | Miseq2  | 1        | BX       | 2x250bp     |         |
|          | 77      | XT      | 4      | Miseq2  | 1        | DSV      | 2x250bp     |         |
|          | 78      | XT      | 4      | Miseq2  | 1        | EF       | 2x250bp     |         |
|          | 80      | XT      | 4      | Miseq2  | 1        | TT       | 2x250bp     |         |
|          | 81      | N       | 4      | Miseq2  | 50       | NE       | 2x250bp     |         |
|          | 82      | N       | 4      | Miseq2  | 50       | TV       | 2x250bp     |         |
| 102      | XT      | 5       | Miseq2 | 1       | BX       | 2x250bp  |             |         |
| 103      | XT      | 5       | Miseq2 | 1       | RHO      | 2x250bp  |             |         |
| 104      | XT      | 5       | Miseq2 | 1       | TT       | 2x250bp  |             |         |
| GAII     | 4       | S       | 1      | GAII1   | 500      | MB       | 2x101bp     |         |
|          | 5       | P       | 2      | GAII1   | 0.5      | MB       | 2x101bp     |         |
|          | 6       | P       | 2      | GAII1   | 0.05     | MB       | 2x101bp     |         |
|          | 7       | P       | 2      | GAII1   | 0.05     | MB       | 2x101bp     |         |
|          | 8       | S       | 2      | GAII1   | 500      | MUB      | 2x101bp     |         |
|          | 10      | N       | 3      | GAII1   | 0.5      | MUB      | 2x100bp     |         |
|          | 11      | N       | 3      | GAII1   | 50       | MUB      | 2x100bp     |         |
|          | 12      | N       | 3      | GAII1   | 50       | MB       | 2x100bp     |         |
|          | 31      | N       | 3      | GAII1   | 0.5      | MB       | 2x100bp     |         |
|          | 32      | P       | 2      | GAII1   | 0.5      | MB       | 2x101bp     |         |
|          | 33      | P       | 2      | GAII1   | 0.5      | MB       | 2x101bp     |         |
|          | 34      | P       | 2      | GAII1   | 0.05     | MB       | 2x101bp     |         |
|          | 35      | P       | 2      | GAII1   | 0.05     | MB       | 2x101bp     |         |
|          | HiSeq   | 15      | N      | 1       | Hiseq1   | 50       | MB          | 2x100bp |
|          |         | 16      | N      | 1       | Hiseq1   | 50       | MUB         | 2x101bp |
| 21       |         | XT      | 1      | Hiseq1  | 1        | MB       | 2x101bp     |         |
| 22       |         | XT      | 1      | Hiseq1  | 1        | MB       | 2x101bp     |         |
| 23       |         | XT      | 1      | Hiseq1  | 1        | MUB      | 2x101bp     |         |
| 24       |         | XT      | 1      | Hiseq1  | 1        | MUB      | 2x101bp     |         |
| 25       |         | XT      | 1      | Hiseq1  | 1        | DSV      | 2x101bp     |         |
| 26       |         | XT      | 1      | Hiseq1  | 1        | RHO      | 2x101bp     |         |
| 63       |         | XT      | 2      | Hiseq1  | 1        | MB       | 2x100bp     |         |
| 64       |         | XT      | 2      | Hiseq1  | 1        | MB       | 2x100bp     |         |
| 65       |         | XT      | 2      | Hiseq1  | 1        | MUB      | 2x100bp     |         |
| 66       |         | XT      | 2      | Hiseq1  | 1        | MUB      | 2x100bp     |         |
| 70       |         | N       | 2      | Hiseq1  | 50       | MB       | 2x100bp     |         |
| 71       |         | N       | 2      | Hiseq1  | 50       | MUB      | 2x100bp     |         |
| 74       |         | S       | 2      | Hiseq1  | 250      | MB       | 2x100bp     |         |
| 75       | S       | 2       | Hiseq1 | 250     | MUB      | 2x100bp  |             |         |

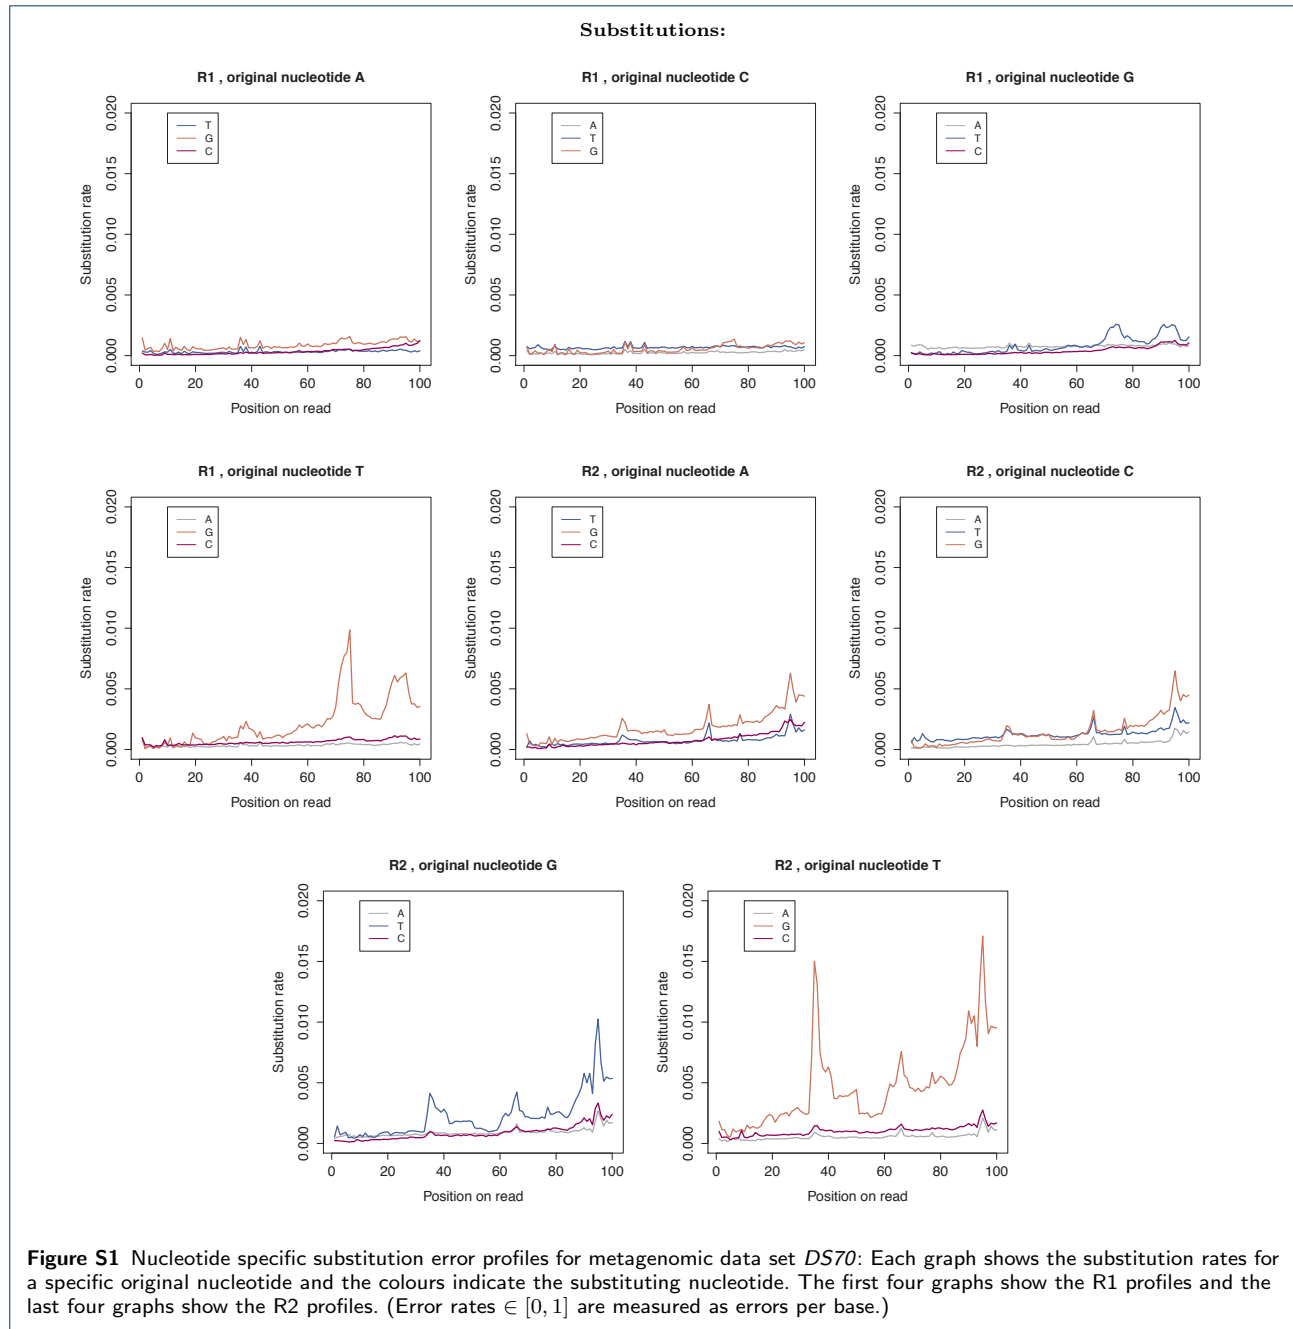

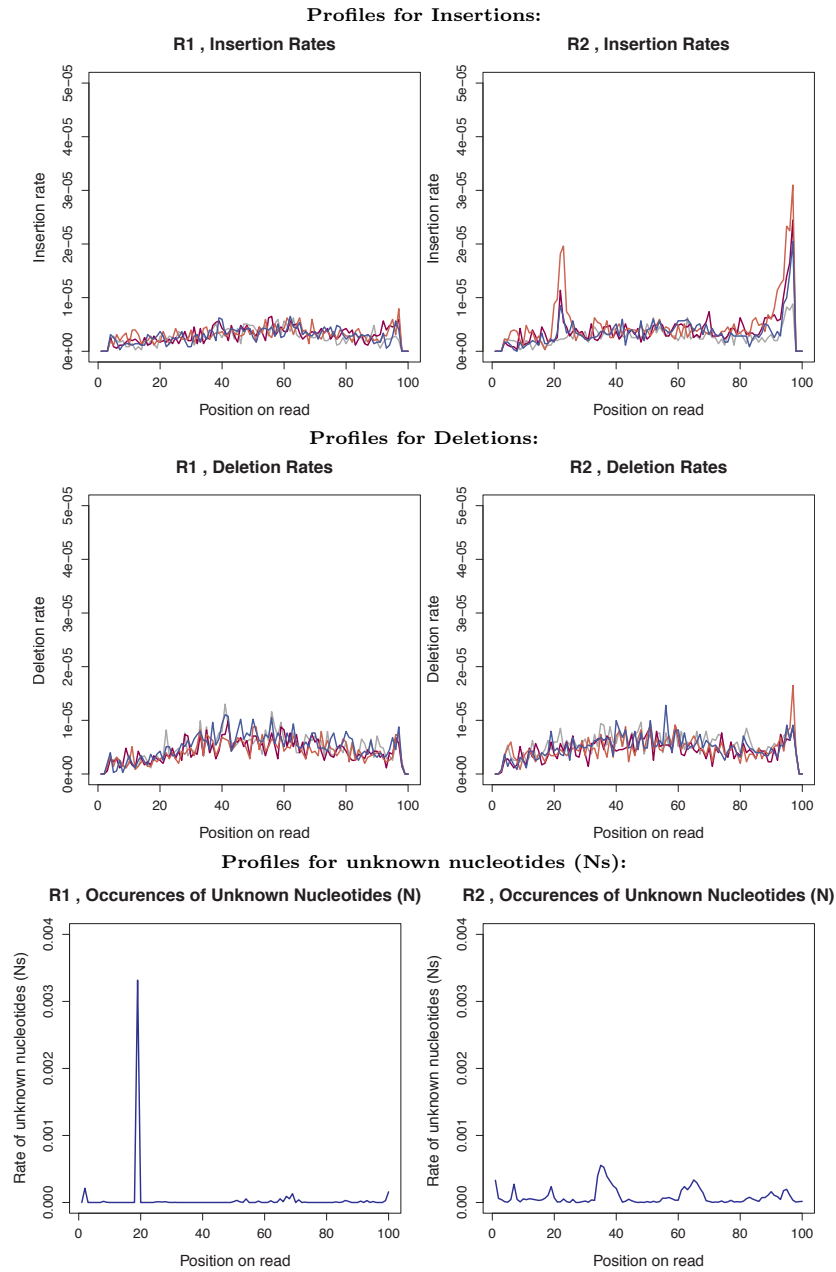

**Figure S2** Error profiles for insertions, deletions and unknown nucleotides (Ns): The three graphs on the left show the R1 error profiles. For insertions, the colour identifies the inserted nucleotide and for deletions the colour refers to the type of nucleotide that was deleted. The three graphs on the right display the error profiles for the R2 reads, respectively. Rates are measured as nucleotides per base.

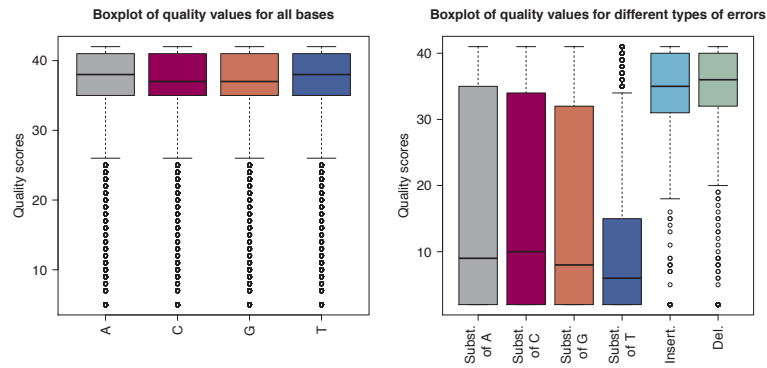

(a) R1 quality profiles

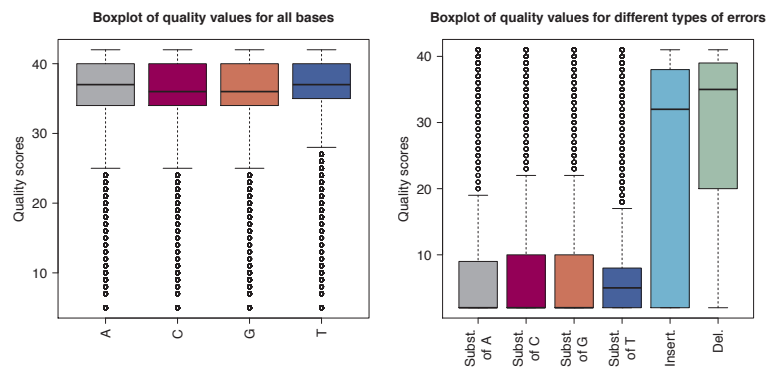

(b) R2 quality profiles

**Figure S3** Quality profiles for R1 and R2 reads: The box plots in the first column display the distribution of quality scores for all bases. The second column shows the distribution of quality scores associated with errors.

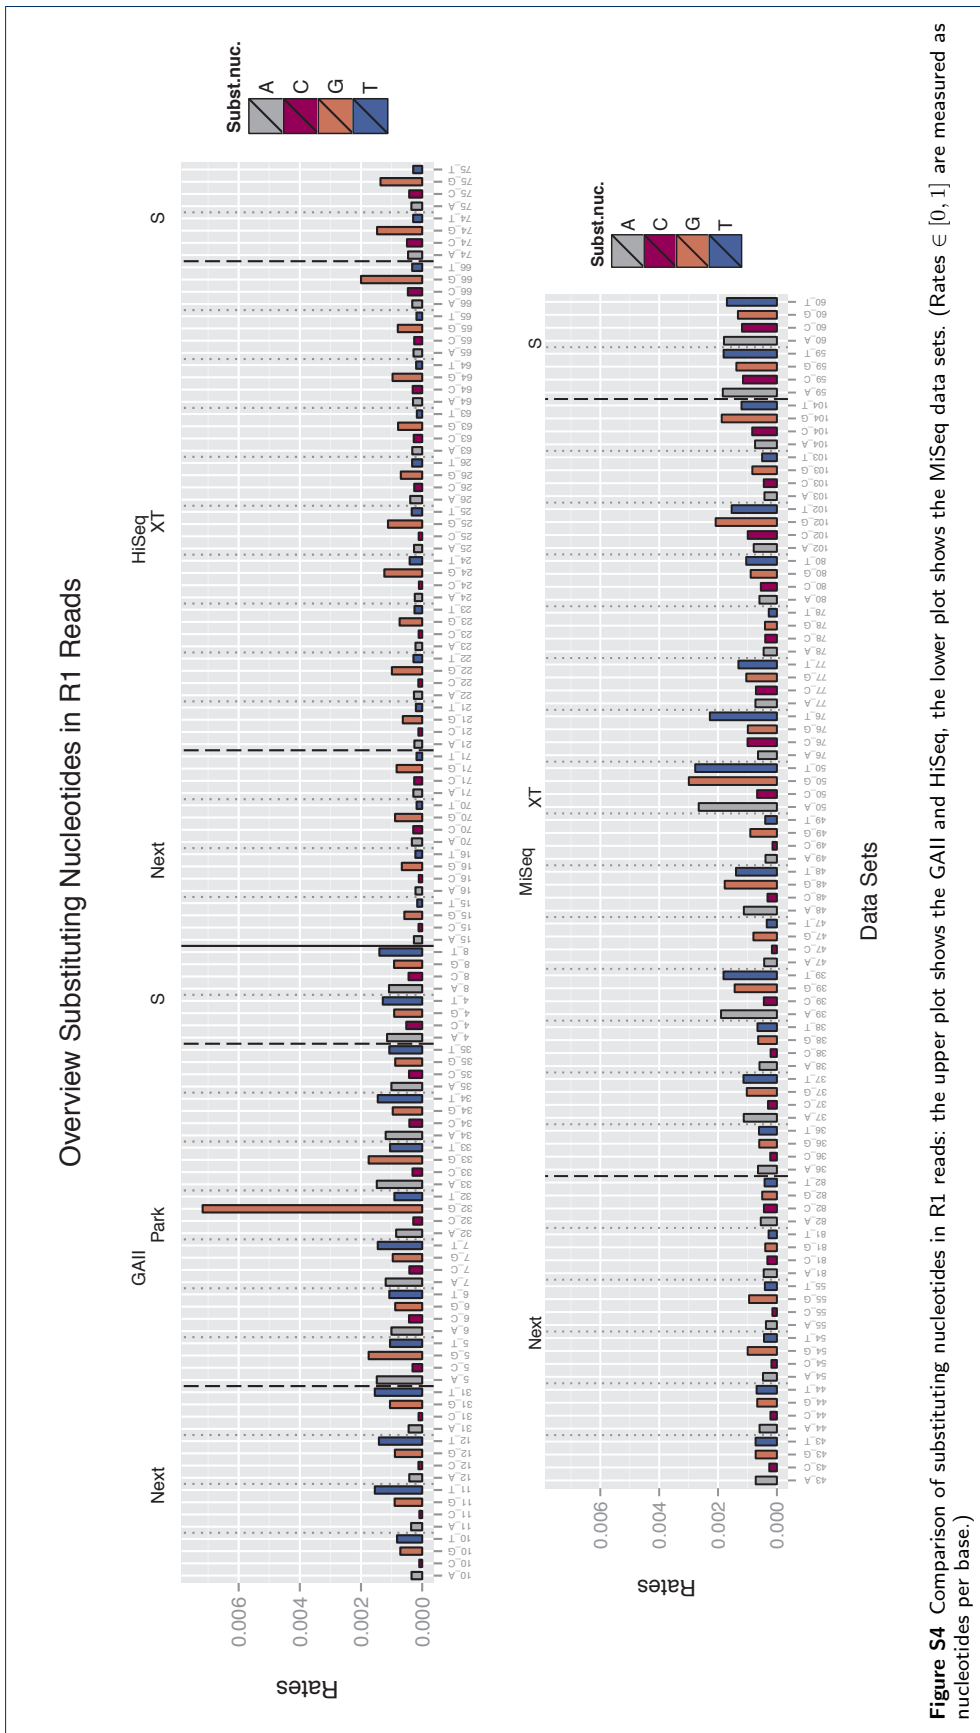

**Figure S4** Comparison of substituting nucleotides in R1 reads: the upper plot shows the GALL and HiSeq, the lower plot shows the MiSeq data sets. (Rates  $\in [0, 1]$  are measured as nucleotides per base.)

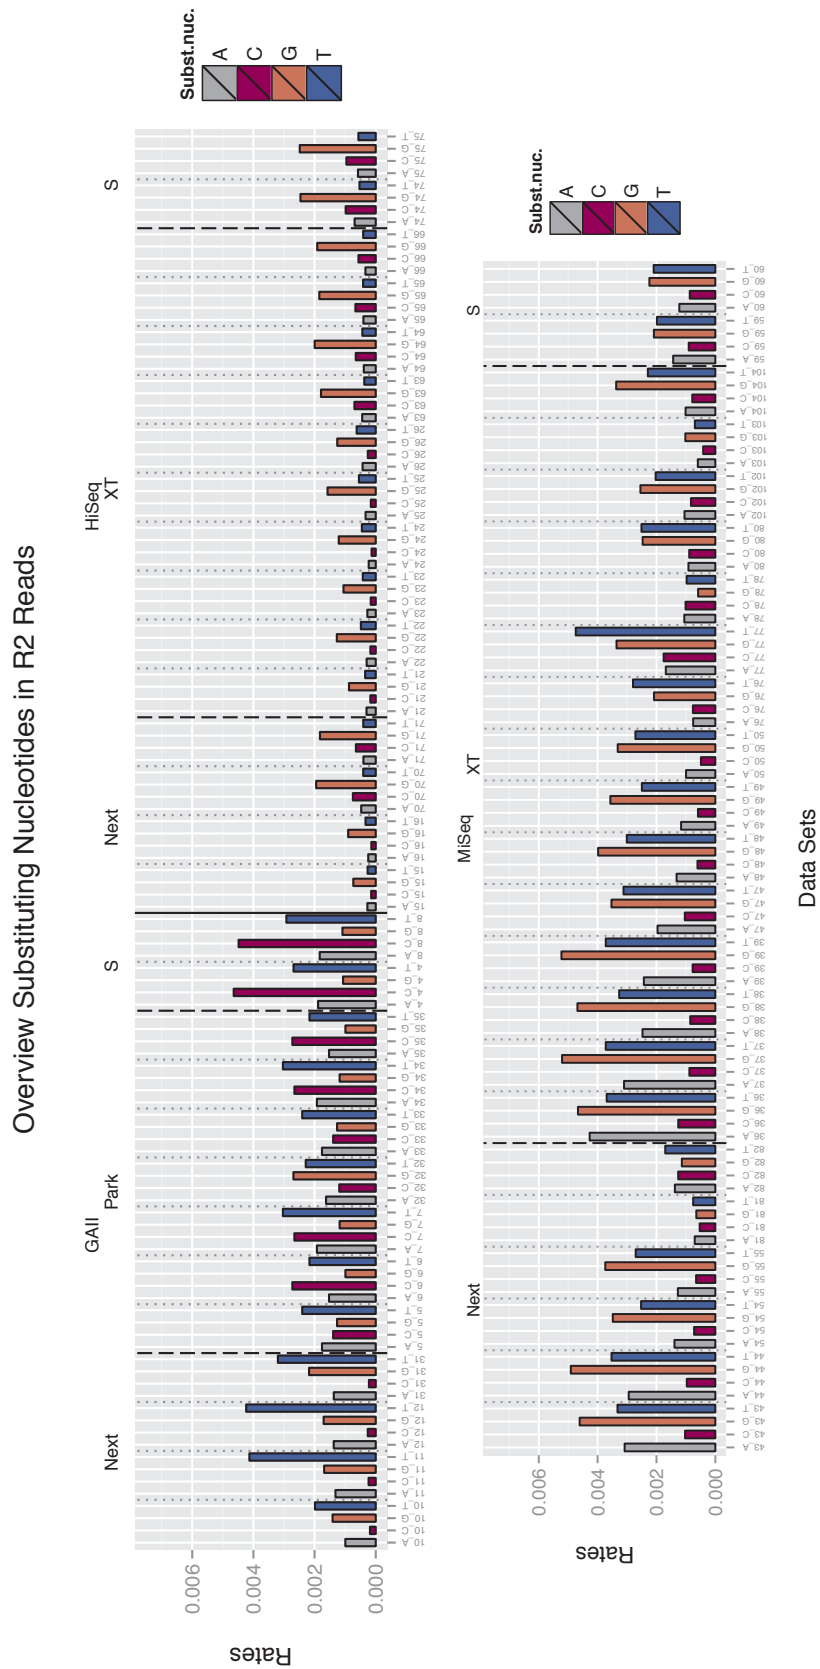

**Figure S5** Comparison of substituting nucleotides in R2 reads: the upper plot shows the GAll and HiSeq, the lower plot shows the MiSeq data sets. (Rates  $\in [0, 1]$  are measured as nucleotides per base.)

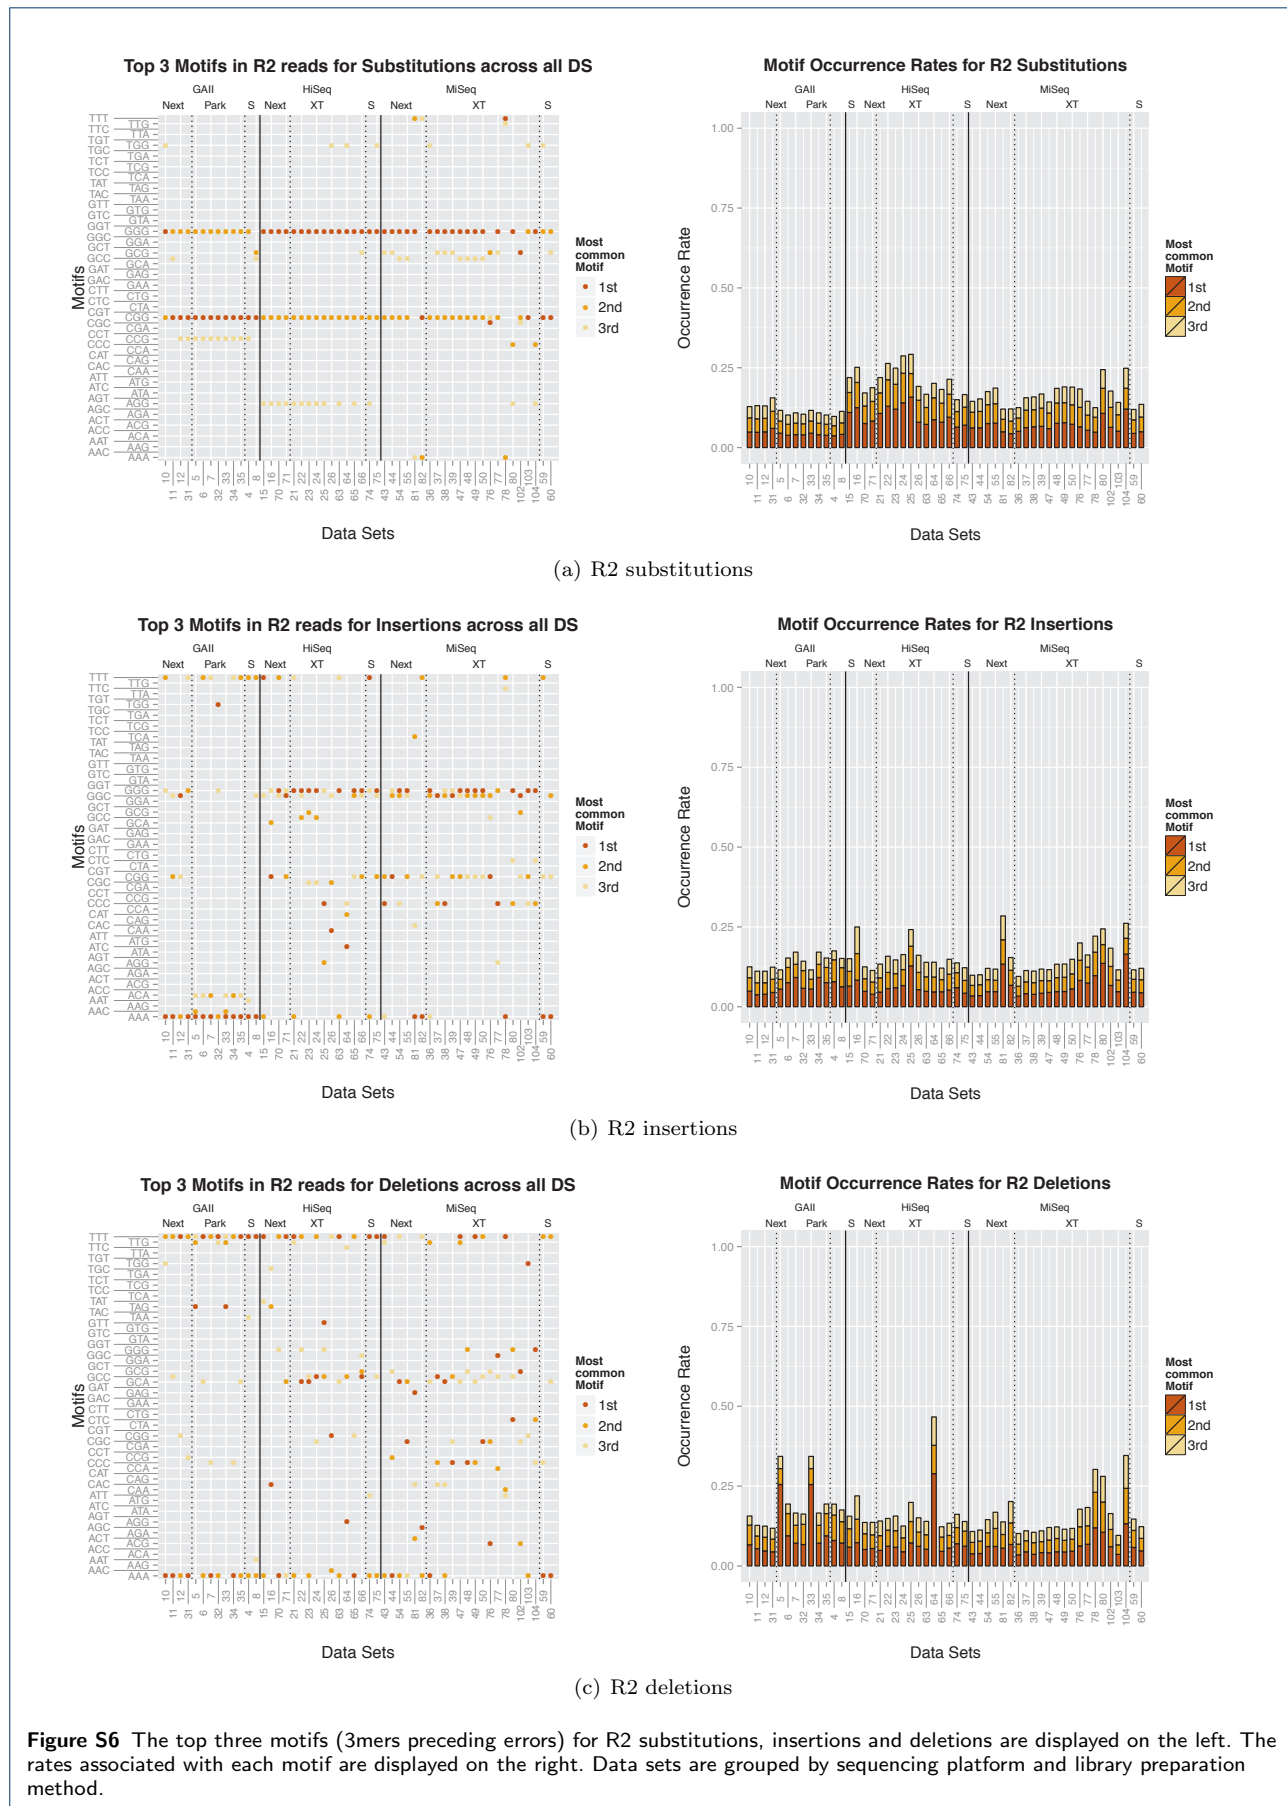

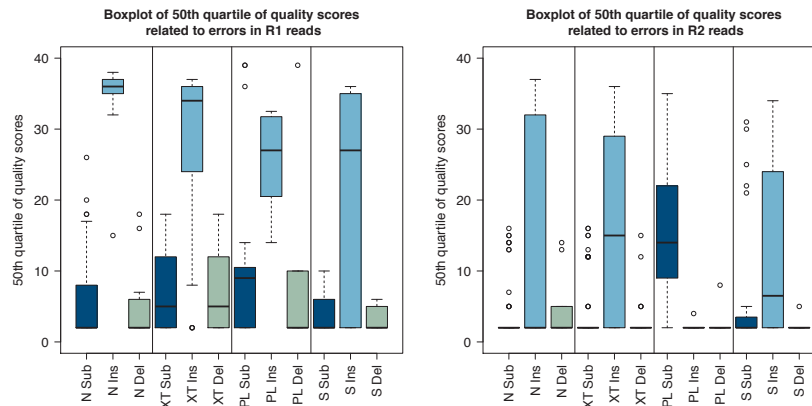

**Figure S7** Overview of the 50th quartile of quality scores associated with errors across all data sets. The results for the R1 reads are displayed on the left and the results for the R2 reads are on the right. Data sets were grouped by library preparation method (N = Nextera, XT = NexteraXT, PL = Parkinson, S = Standard TruSeq) and substitution, insertion and deletion errors are displayed separately.

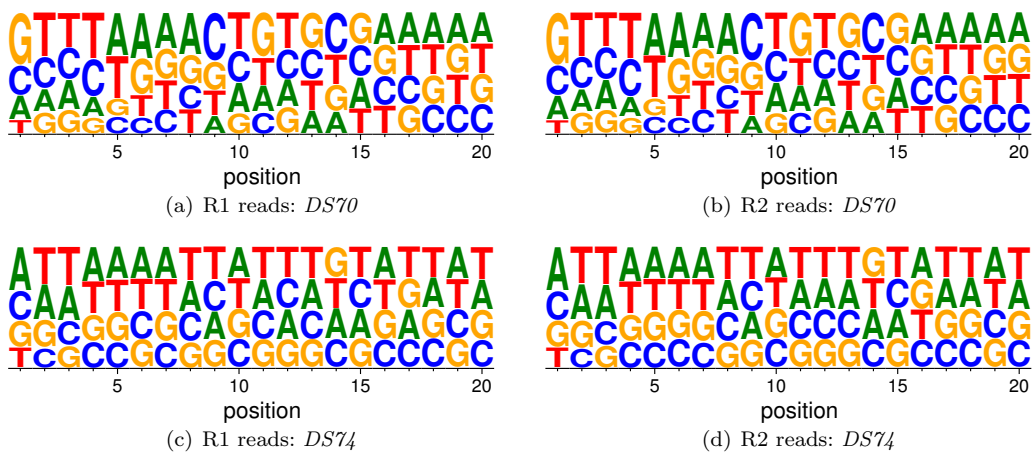

**Figure S8** Transposome insertion bias: The figure displays the nucleotide representation across the first 20bp for the R1 and R2 reads of data set *DS70* and *DS74*, respectively. The library for *DS70* was prepared with the Nextera method and sequenced on a HiSeq; *DS74* was prepared with the standard TruSeq kit and sequenced on a HiSeq.

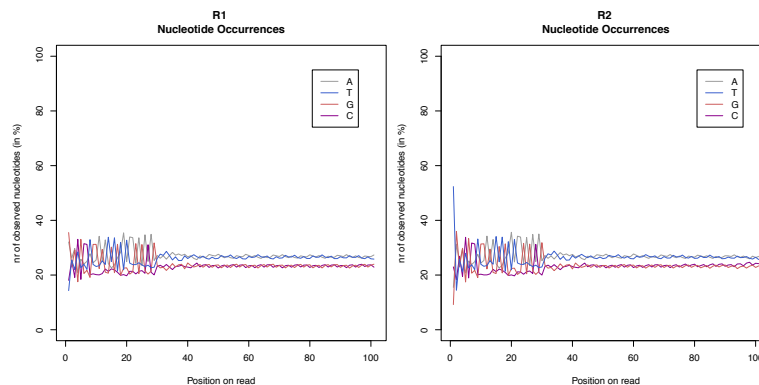

**Figure S9** Nucleotide rates: Comparison of occurrence rates of the four nucleotides across the reads for data set *DS6*. The library for this data set was prepared with the Parkinson method and sequenced on the GAll. Fluctuations were observed at the read start affecting 30bp.



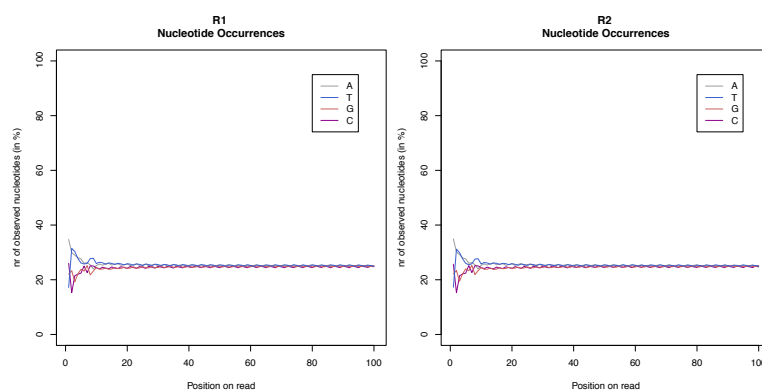

**Figure S10 Nucleotide rates:** Comparison of occurrence rates of the four nucleotides across the reads for data set *DS74*. The library for this data set was prepared with the standard TruSeq method and sequenced on the HiSeq. Fluctuations at the read start are much smaller compared to the transposome-based library technologies and affected a smaller number of bases.

**Top 3 Motifs in R1 reads for Substitutions after quality trimming**

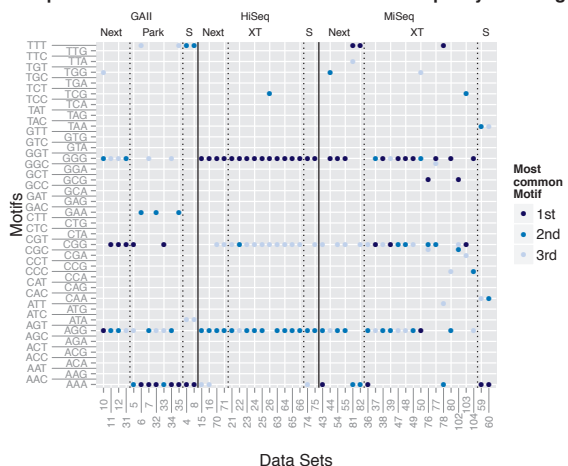

**Motif Occurrence Rates for R1 Substitutions after quality trimming**

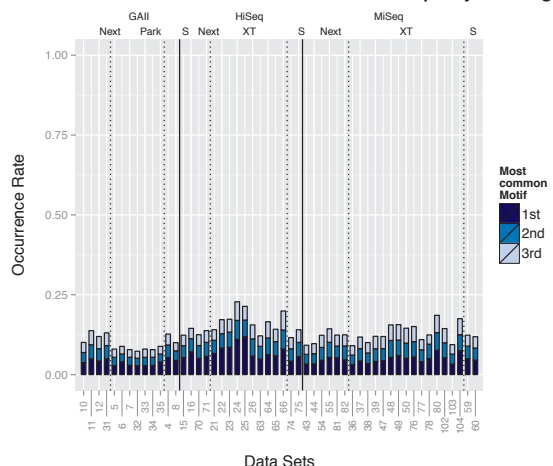

(a) R1 substitutions after quality trimming

**Top 3 Motifs in R1 reads for Insertions after quality trimming**

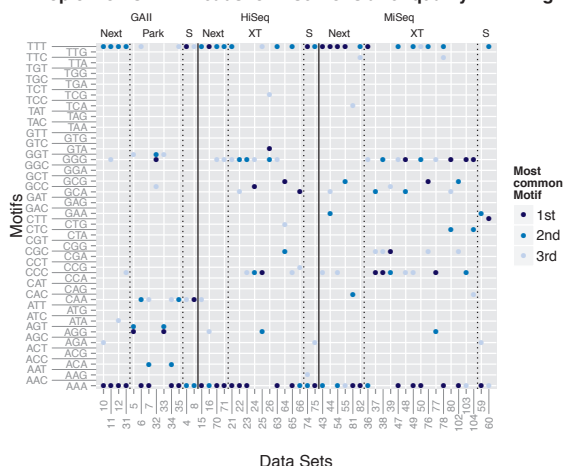

**Motif Occurrence Rates for R1 Insertions after quality trimming**

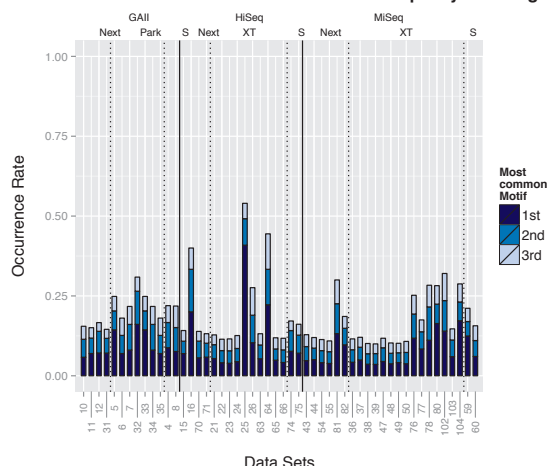

(b) R1 insertions after quality trimming

**Top 3 Motifs in R1 reads for Deletions after quality trimming**

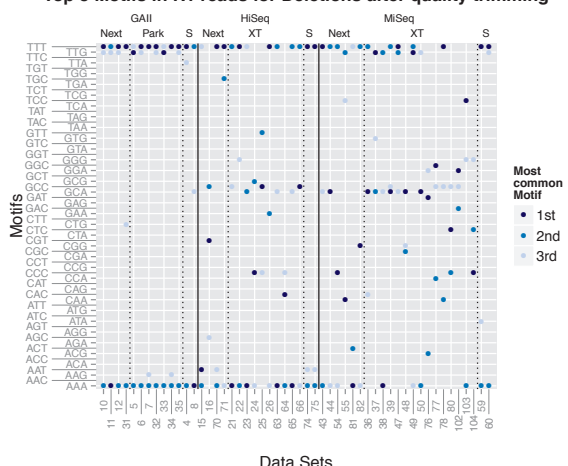

**Motif Occurrence Rates for R1 Deletions after quality trimming**

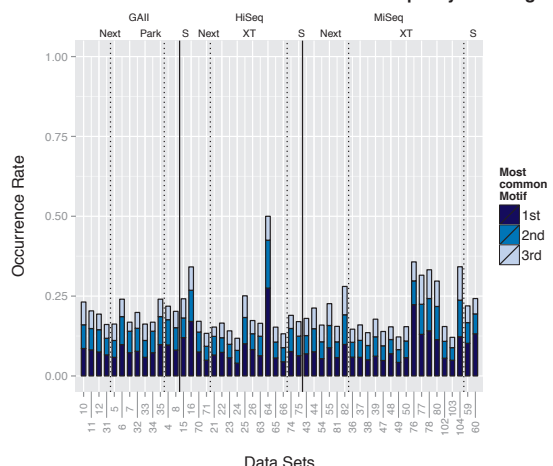

(c) R1 deletions after quality trimming

**Figure S11 Motifs after quality trimming:** The top three motifs (3mers preceding errors) for R1 substitutions, insertions and deletions are displayed on the left. The rates associated with each motif are displayed on the right. Data sets are grouped by sequencing platform and library preparation method.

**Top 3 Motifs in R2 reads for Substitutions after quality trimming**

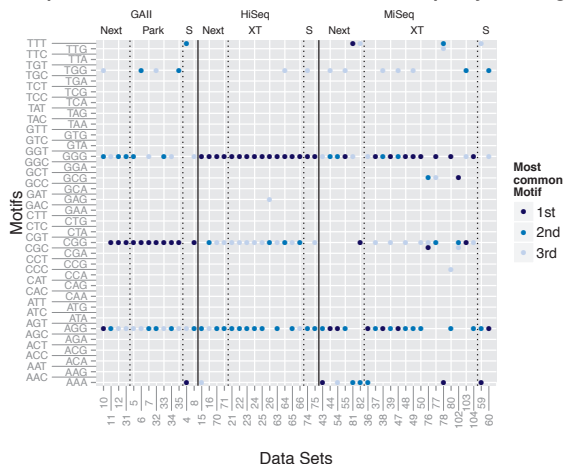

**Motif Occurrence Rates for R2 Substitutions after quality trimming**

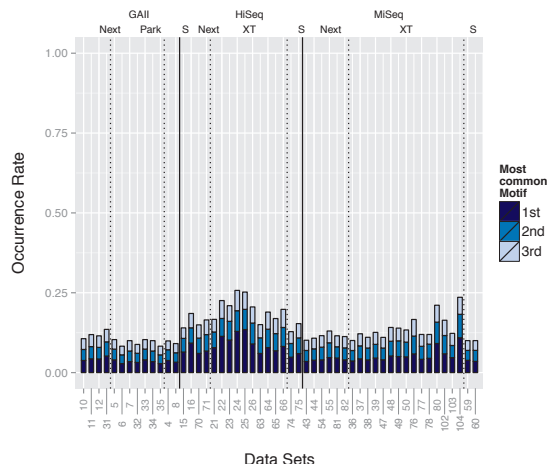

(a) R2 substitutions after quality trimming

**Top 3 Motifs in R2 reads for Insertions after quality trimming**

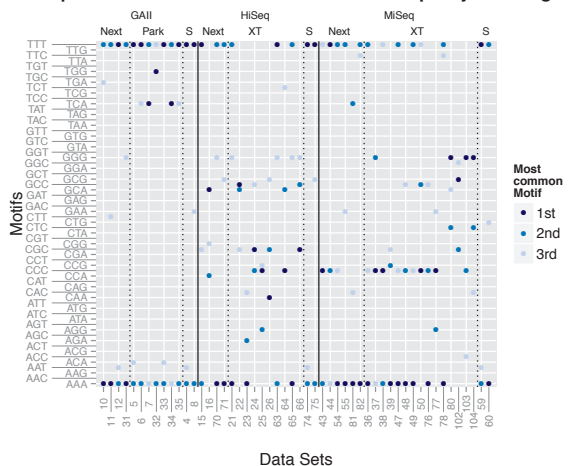

**Motif Occurrence Rates for R2 Insertions after quality trimming**

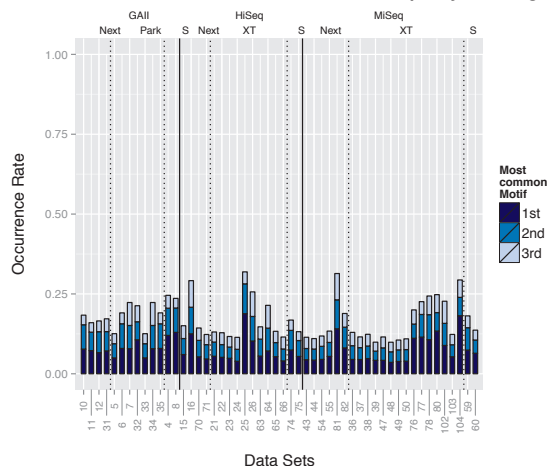

(b) R2 insertions after quality trimming

**Top 3 Motifs in R2 reads for Deletions after quality trimming**

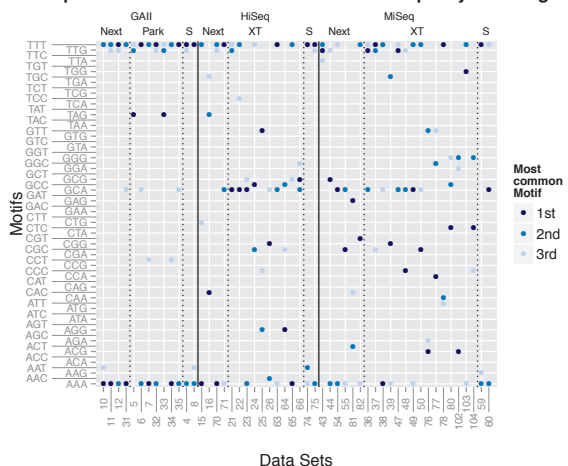

**Motif Occurrence Rates for R2 Deletions after quality trimming**

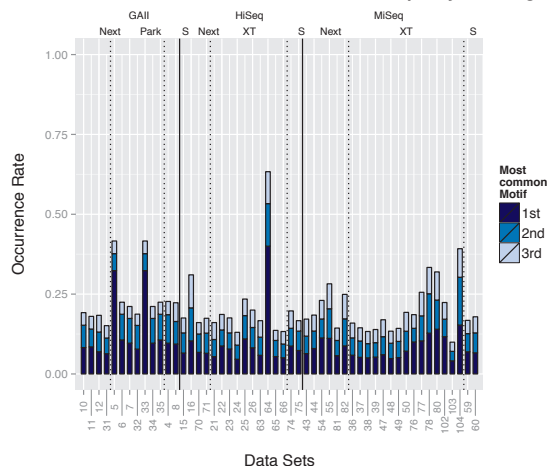

(c) R2 deletions after quality trimming

**Figure S12 Motifs after quality trimming:** The top three motifs (3mers preceding errors) for R2 substitutions, insertions and deletions are displayed on the left. The rates associated with each motif are displayed on the right. Data sets are grouped by sequencing platform and library preparation method.

**Table S2** Overview of the most common motifs implicated in substitutions for GAI, HiSeq and MiSeq after quality trimming.

| Platform | R1/R2 | 1st motif | 2nd motif | 3rd motif |
|----------|-------|-----------|-----------|-----------|
| GAI      | R1    | AAA/CGG   | AGG       | AGG/GGG   |
| GAI      | R2    | CGG       | AGG/GGG   | AGG       |
| HiSeq    | R1    | GGG       | AGG       | CGG       |
| HiSeq    | R2    | GGG       | AGG       | CGG       |
| MiSeq    | R1    | GGG       | AGG       | CGG       |
| MiSeq    | R2    | GGG       | AGG       | CGG       |

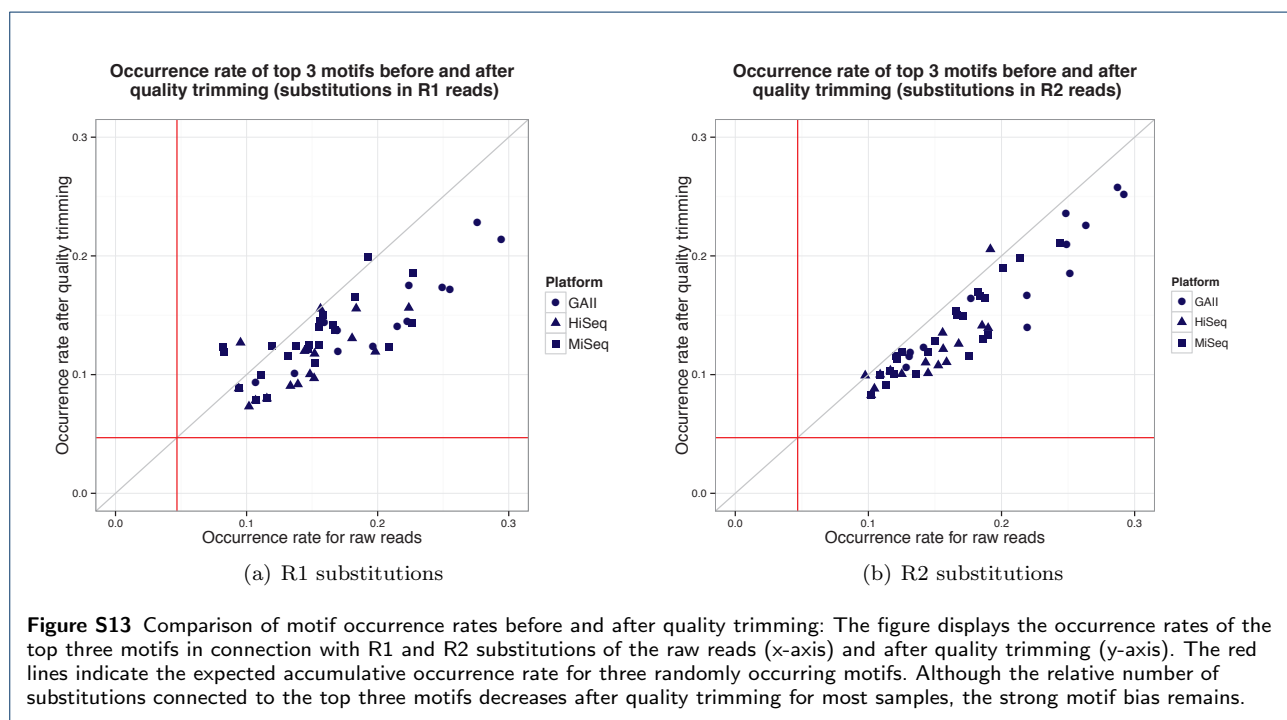

**Top 3 Motifs in R1 reads for Substitutions after BayesHammer**

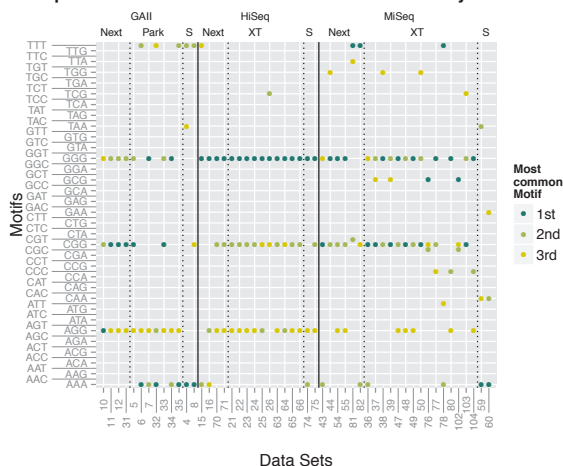

**Motif Occurrence Rates for R1 Substitutions after BayesHammer**

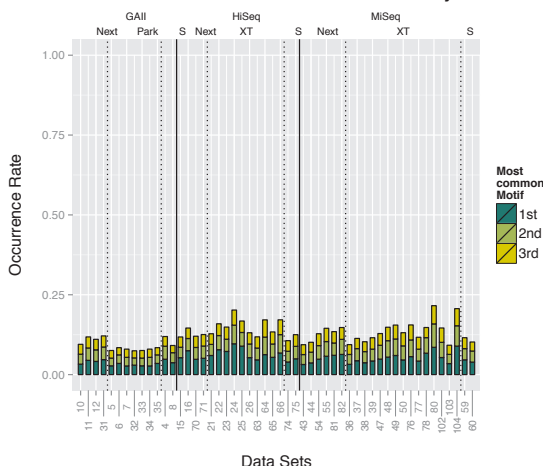

(a) R1 substitutions after BayesHammer

**Top 3 Motifs in R1 reads for Insertions after BayesHammer**

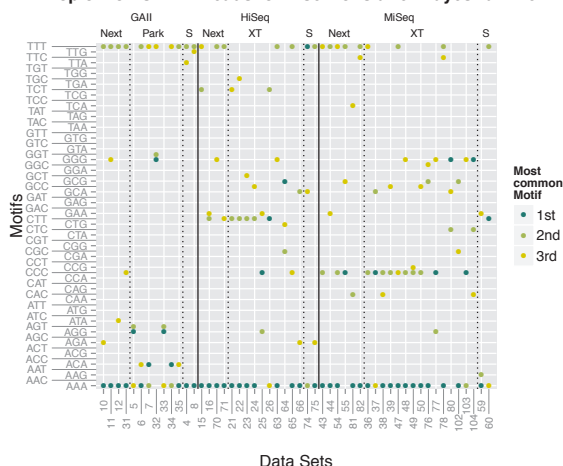

**Motif Occurrence Rates for R1 Insertions after BayesHammer**

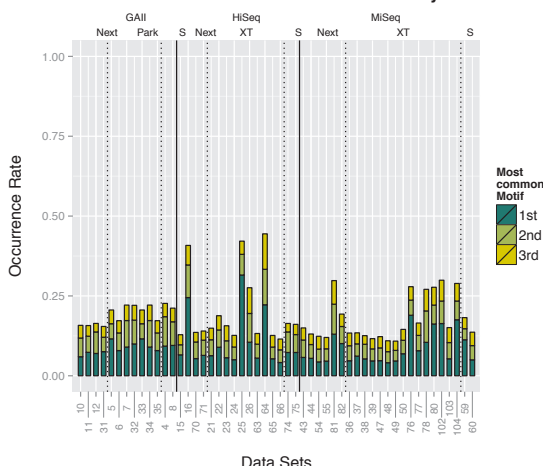

(b) R1 insertions after BayesHammer

**Top 3 Motifs in R1 reads for Deletions after BayesHammer**

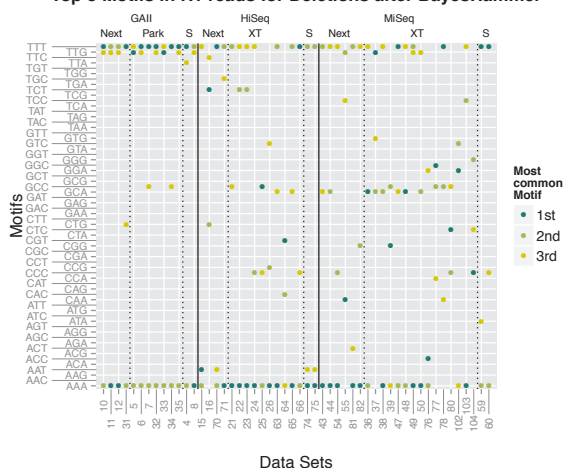

**Motif Occurrence Rates for R1 Deletions after BayesHammer**

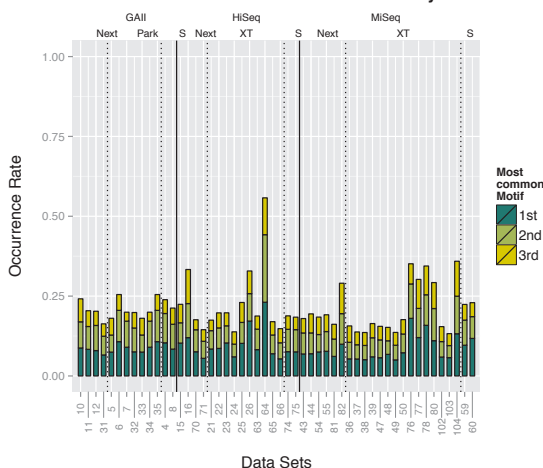

(c) R1 deletions after BayesHammer

**Figure S14** Motifs after BayesHammer: The top three motifs (3mers preceding errors) for R1 substitutions, insertions and deletions are displayed on the left. The rates associated with each motif are displayed on the right. Data sets are grouped by sequencing platform and library preparation method.

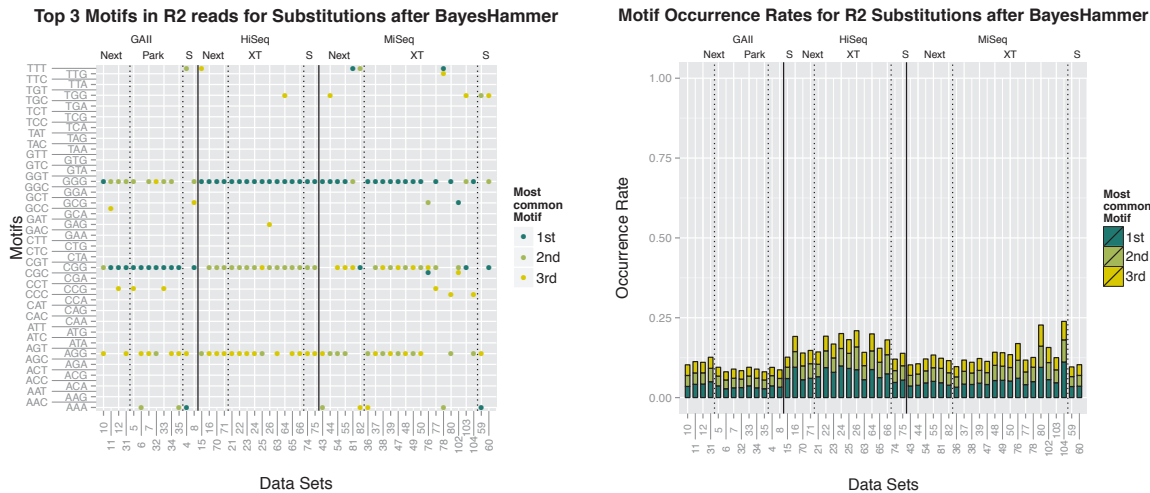

(a) R2 substitutions after BayesHammer

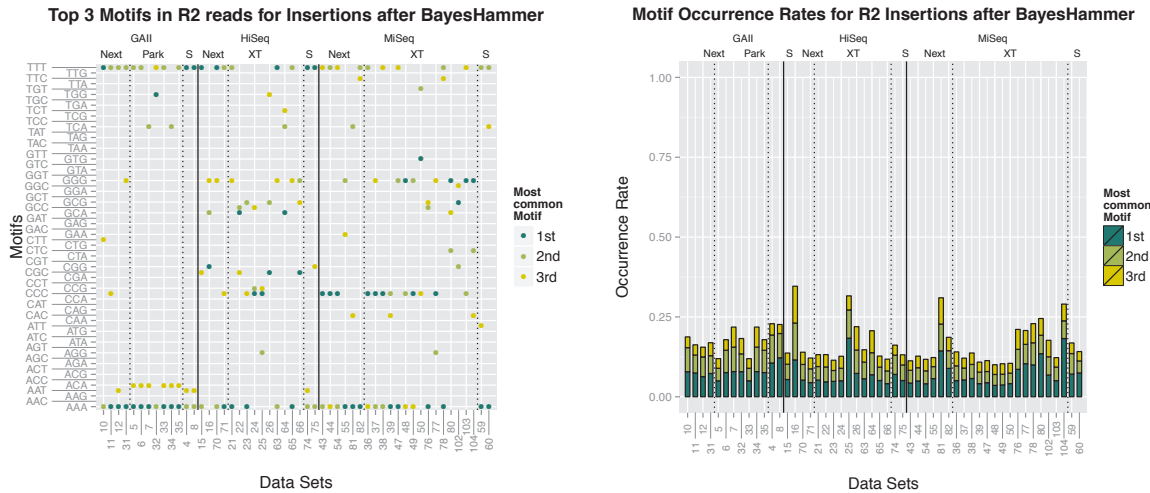

(b) R2 insertions after BayesHammer

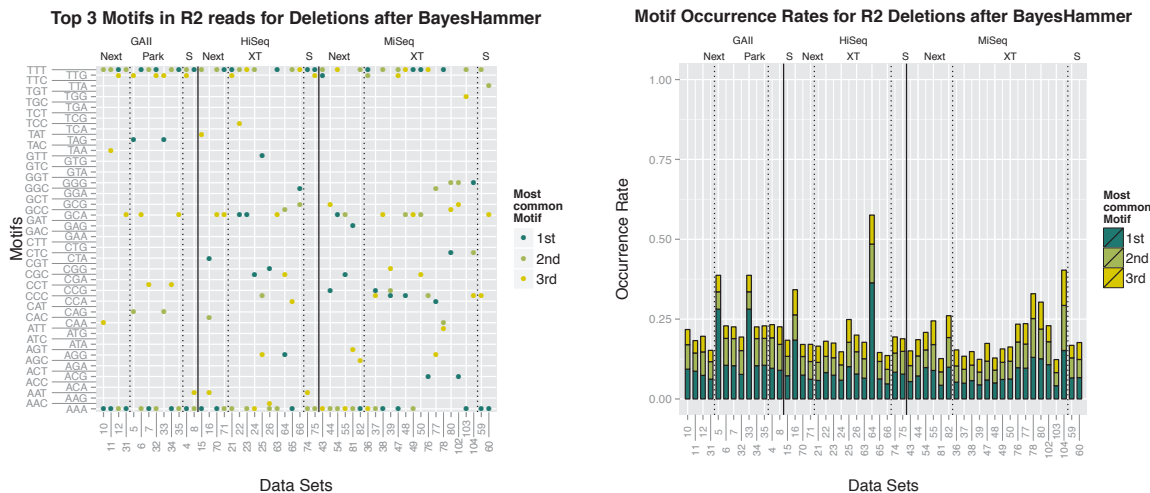

(c) R2 deletions after BayesHammer

**Figure S15** Motifs after NextSequencing: The top three motifs (3mers preceding errors) for R2 substitutions, insertions and deletions are displayed on the left. The rates associated with each motif are displayed on the right. Data sets are grouped by sequencing platform and library preparation method.

**Table S3** Overview of the most common motifs implicated in substitutions for GAll, HiSeq and MiSeq after error correction with BayesHammer.

| Platform | R1/R2 | 1st motif | 2nd motif | 3rd motif |
|----------|-------|-----------|-----------|-----------|
| GAll     | R1    | AAA/CGG   | GGG       | AGG       |
| GAll     | R2    | CGG       | GGG       | AGG       |
| HiSeq    | R1    | GGG       | AGG       | CGG       |
| HiSeq    | R2    | GGG       | CGG       | AGG       |
| MiSeq    | R1    | GGG       | CGG       | AGG       |
| MiSeq    | R2    | GGG       | AGG       | CGG       |

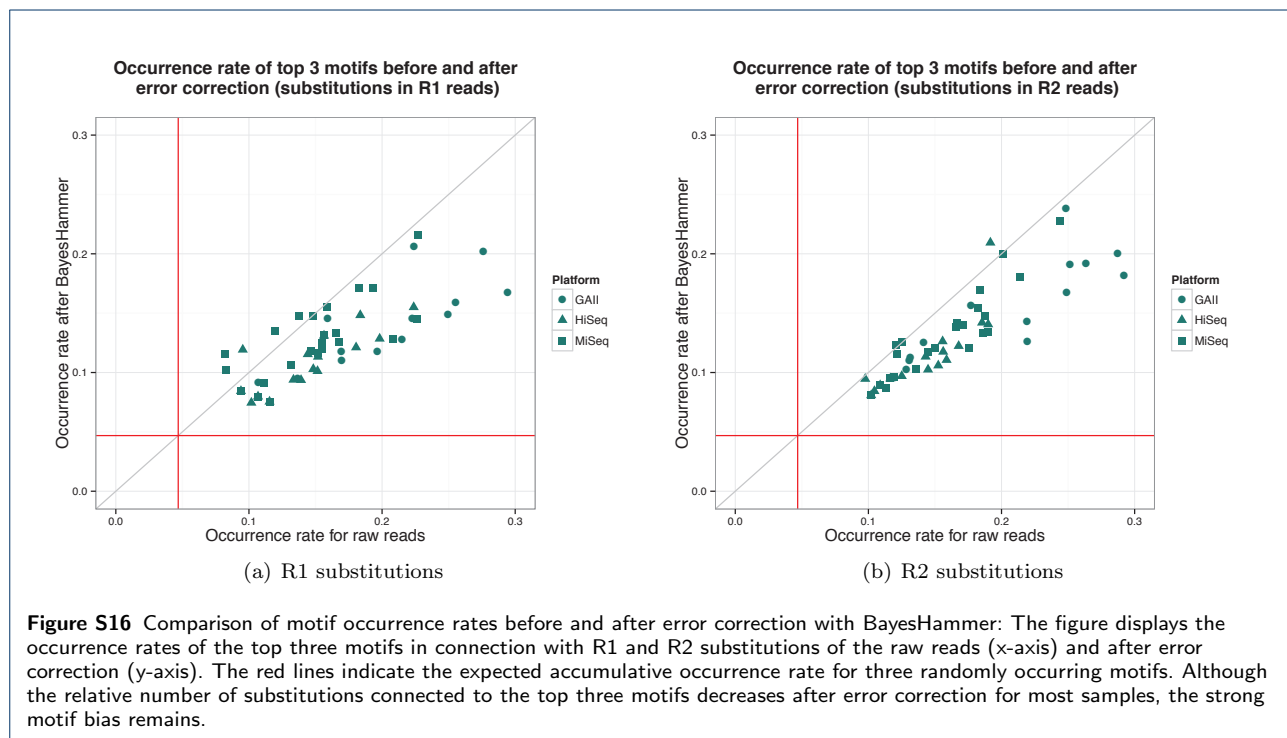

**Figure S16** Comparison of motif occurrence rates before and after error correction with BayesHammer: The figure displays the occurrence rates of the top three motifs in connection with R1 and R2 substitutions of the raw reads (x-axis) and after error correction (y-axis). The red lines indicate the expected accumulative occurrence rate for three randomly occurring motifs. Although the relative number of substitutions connected to the top three motifs decreases after error correction for most samples, the strong motif bias remains.

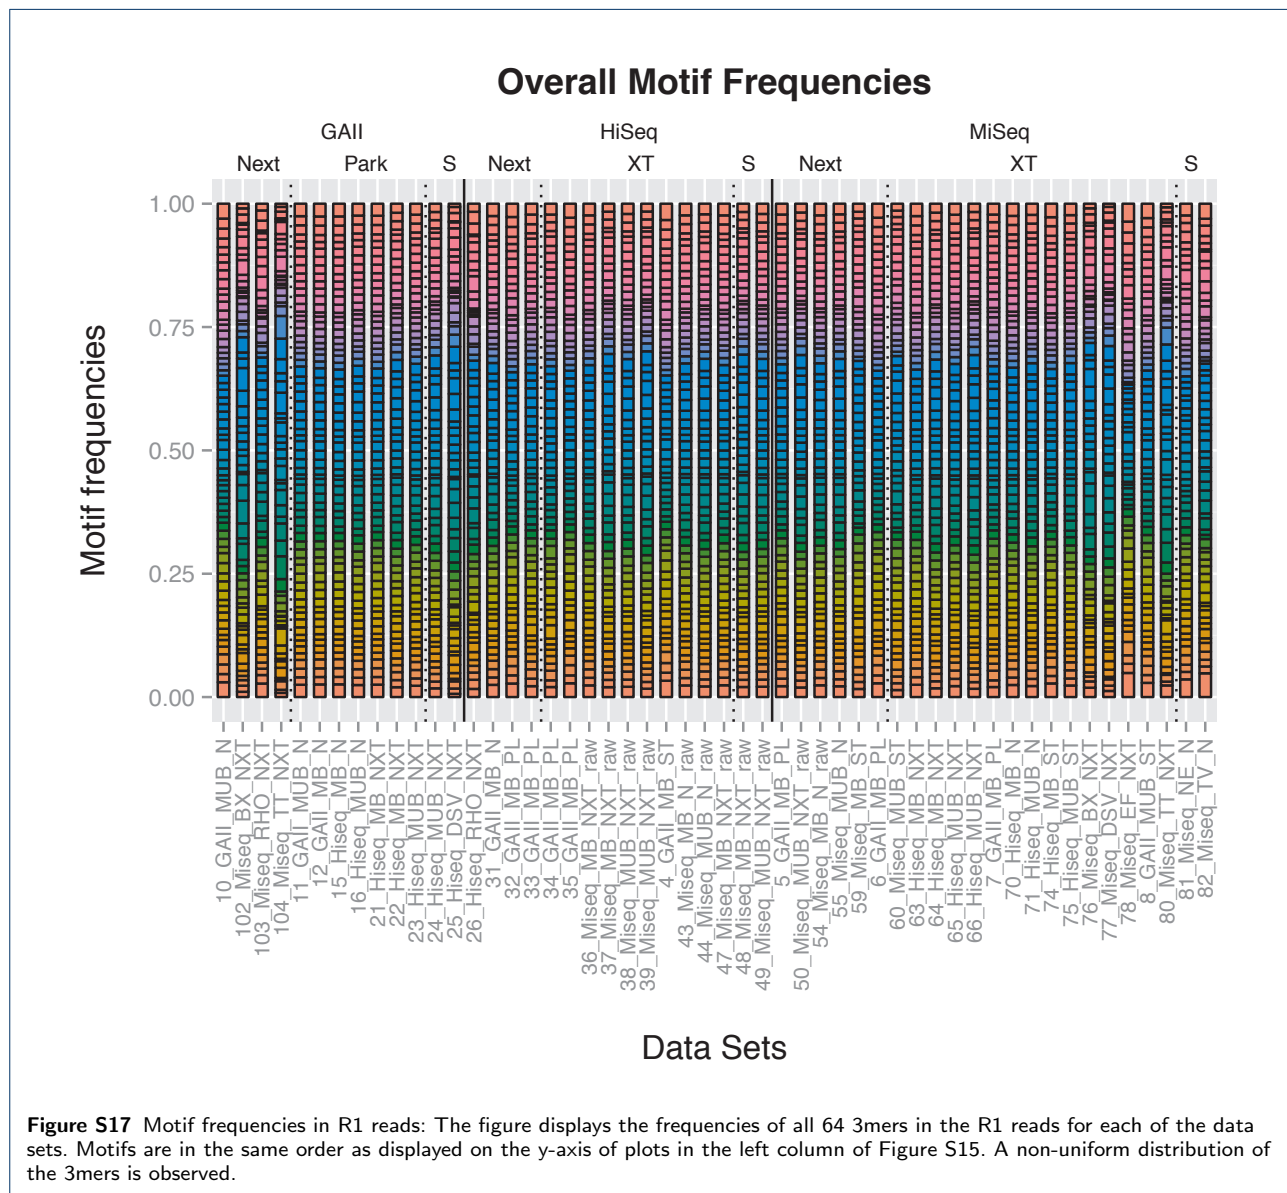

**Figure S17** Motif frequencies in R1 reads: The figure displays the frequencies of all 64 3mers in the R1 reads for each of the data sets. Motifs are in the same order as displayed on the y-axis of plots in the left column of Figure S15. A non-uniform distribution of the 3mers is observed.



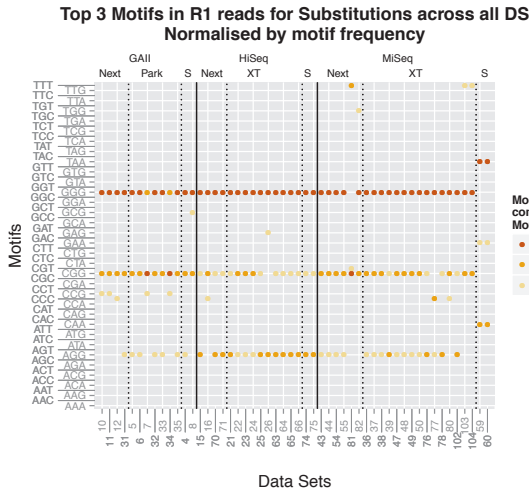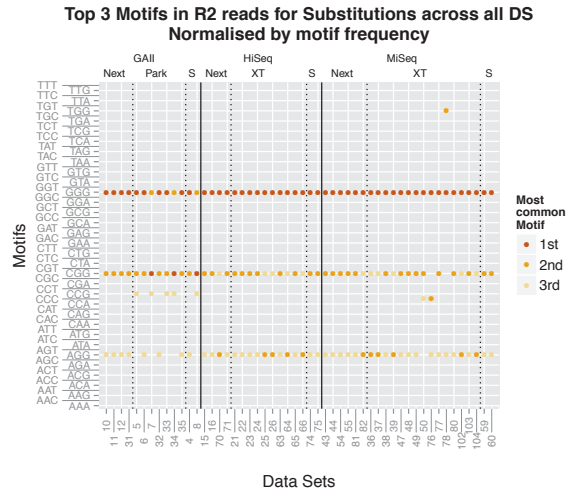

(a) Substitutions

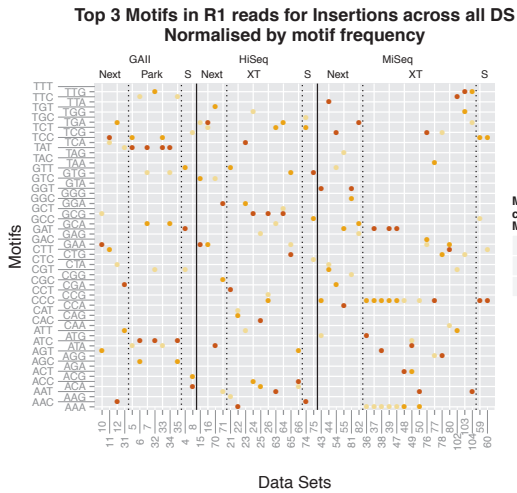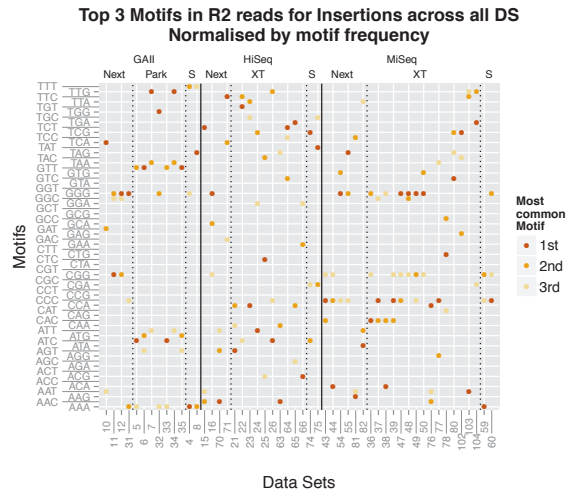

(b) Insertions

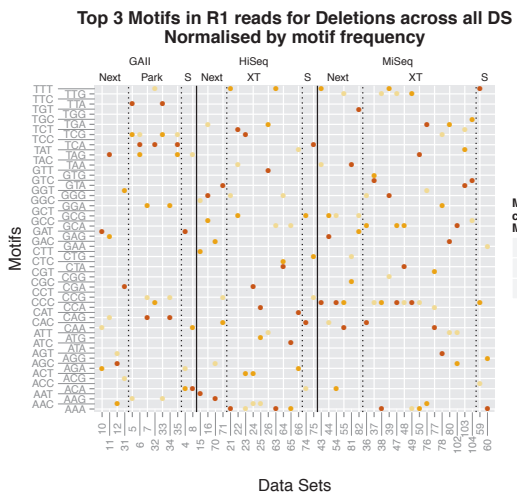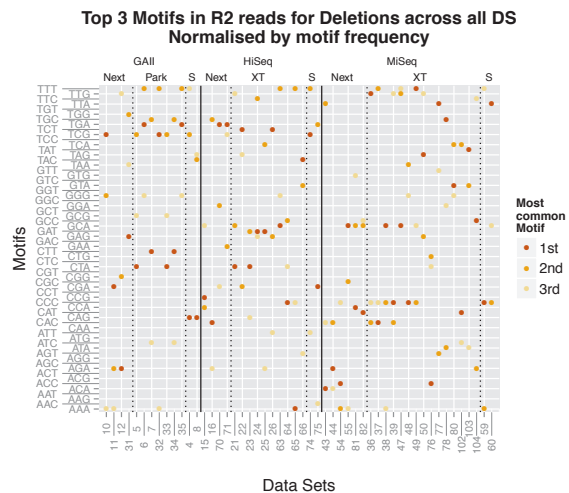

(c) Deletions

**Figure S18** Comparison of motif occurrence rates normalized by motif frequencies: The figure displays the top three motifs in connection with R1 and R2 errors after normalization by motif frequency.
